# Supplementary material
Source: MDPI journal article supplement (https://www.mdpi.com/1996-1073/13/1/20)
Supplement: s1 [file s1]

Archive with 6 entries (6 files):
- Captions.pdf
- Figure S1.jpg
- Video S1.mov
- Video S2.avi
- Video S3.avi
- Video S4.avi
