# Supplementary material
Source: MDPI journal article supplement (https://www.mdpi.com/1996-1073/13/1/20)
Supplement: s1 [file s1 › Captions.pdf]

## Captions to Supplementary

**Figure S1.** SEM images of the central electrode after multiple explosion of microbubbles. The figure demonstrate damage produced by cavitation bubbles rather than exploding bubbles.

**Video S1.** Video of series of explosions made at 23 frames per second and corresponding sound effect.

**Video S2.** Video of exploding microbubble (top view) taken at 10000 frames per second and played at 10 frames per second. Six frames from this video are shown in Fig. 2 (left column).

**Video S3.** Video of exploding microbubble (side view) taken at 10000 frames per second and played at 10 frames per second. Six frames from this video are shown in Fig. 2 (right column).

**Video S4.** Video of exploding microbubble (top view) taken at 73000 frames per second and played at 10 frames per second. The data for Fig. 4 has been collected from this video (see explanations in the main text).
