# Supplementary material
Source: MDPI journal article supplement (https://www.mdpi.com/1996-1073/13/1/20)

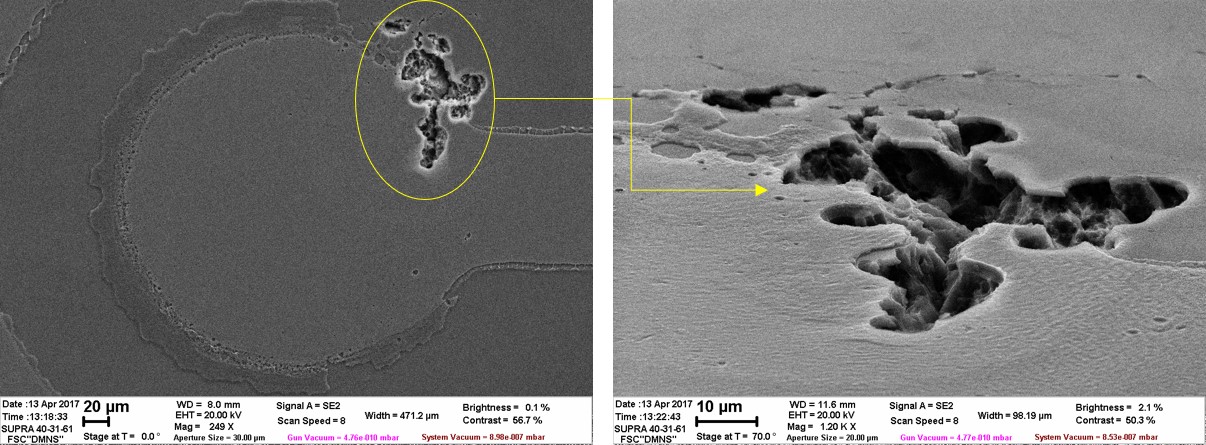

Supplement: s1 [file s1 › Figure S1.jpg]
